# Supplementary material for: Ribosome profiling reveals changes in translational status of soybean transcripts during immature cotyledon development
Source: PubMed Central journal article supplement (PMC5865733; doi:10.1371/journal.pone.0194596), 2018-03-23

# Summary for C25

Filtering Criteria for Very Low TE values:

(Pval<0.05; TE<=0.1 and CT\_RPKM>=10)

Total Number of Genes: 302

Cluster1 : 100 genes

Cluster 2: 88 genes

Cluster 3: 114 genes

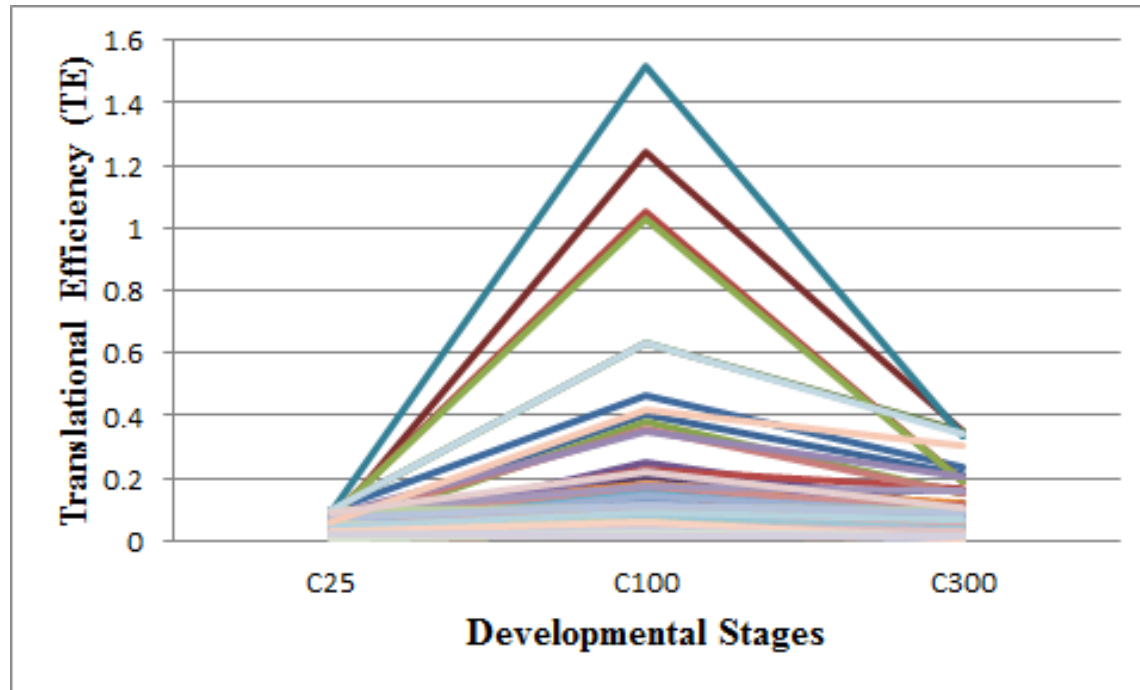

Cluster1 : 100 genes

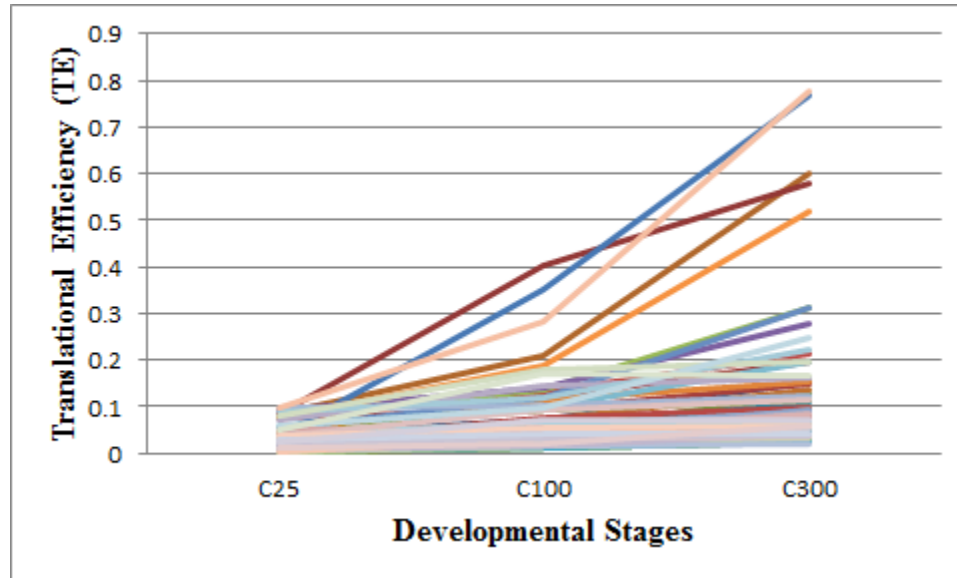

Cluster 2: 88 genes

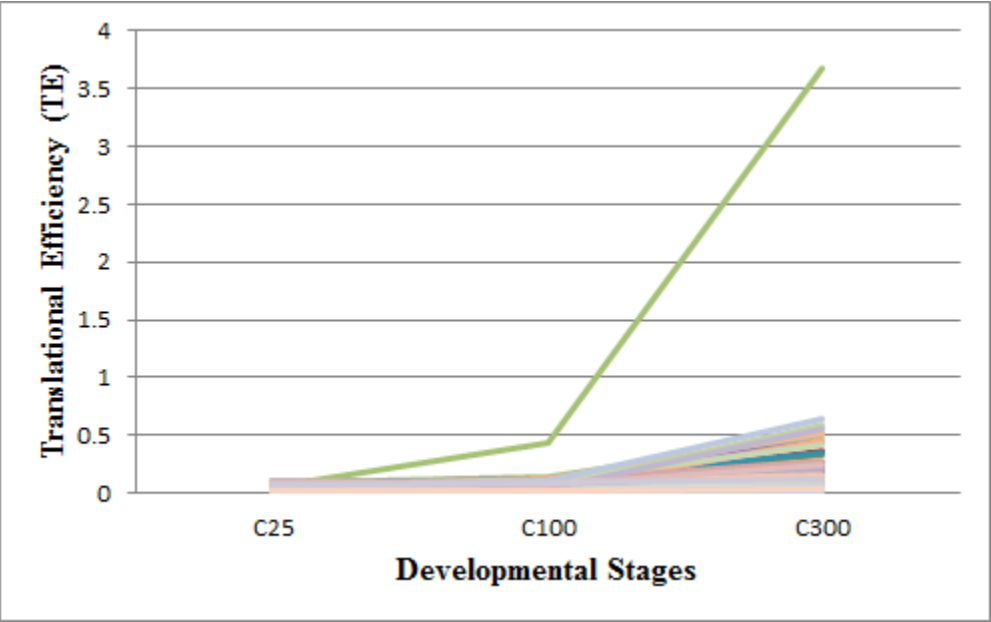

Cluster 3: 114 genes

# Summary for C100

Filtering Criteria for Very Low TE Values:

(Pval<0.05; TE<=0.1 and CT\_RPKM>=10)

Total Number of Genes: 218

Cluster1 : 66 genes

Cluster 2: 42 genes

Cluster 3: 110 genes

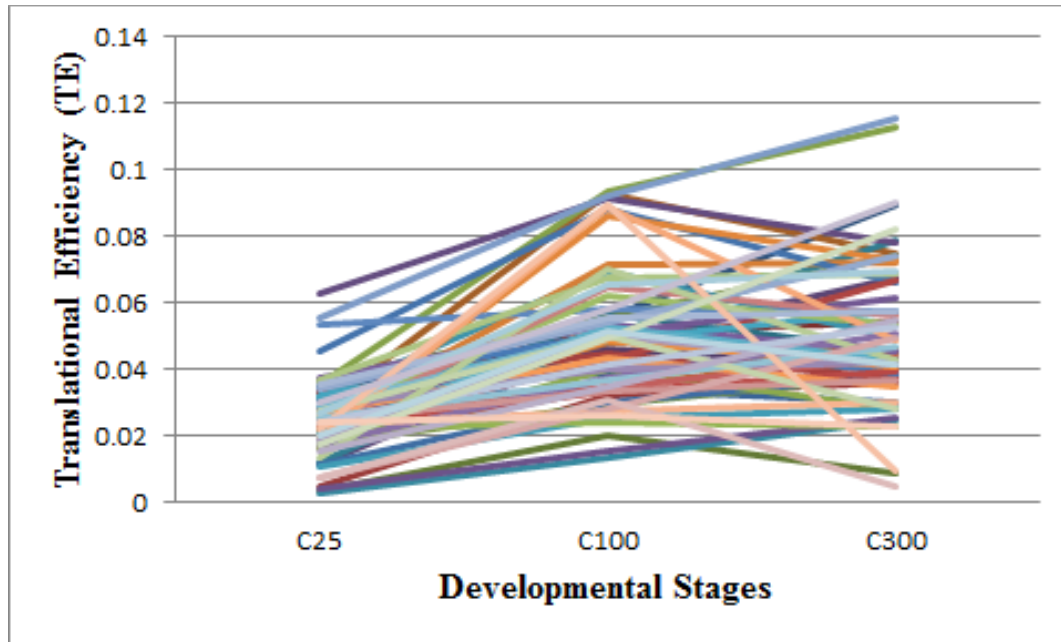

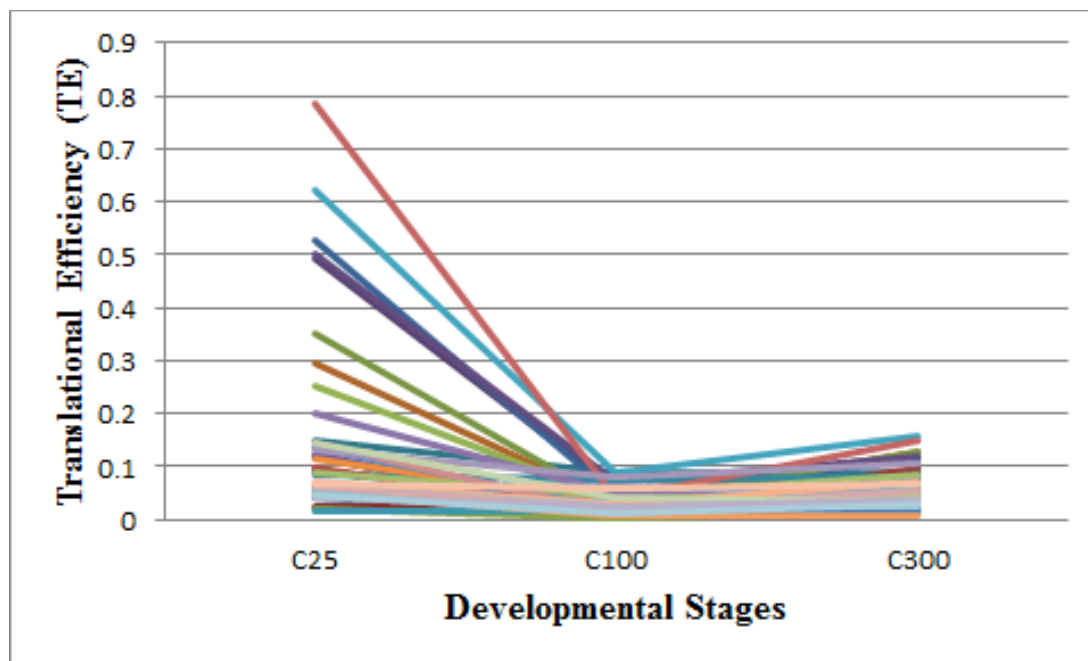

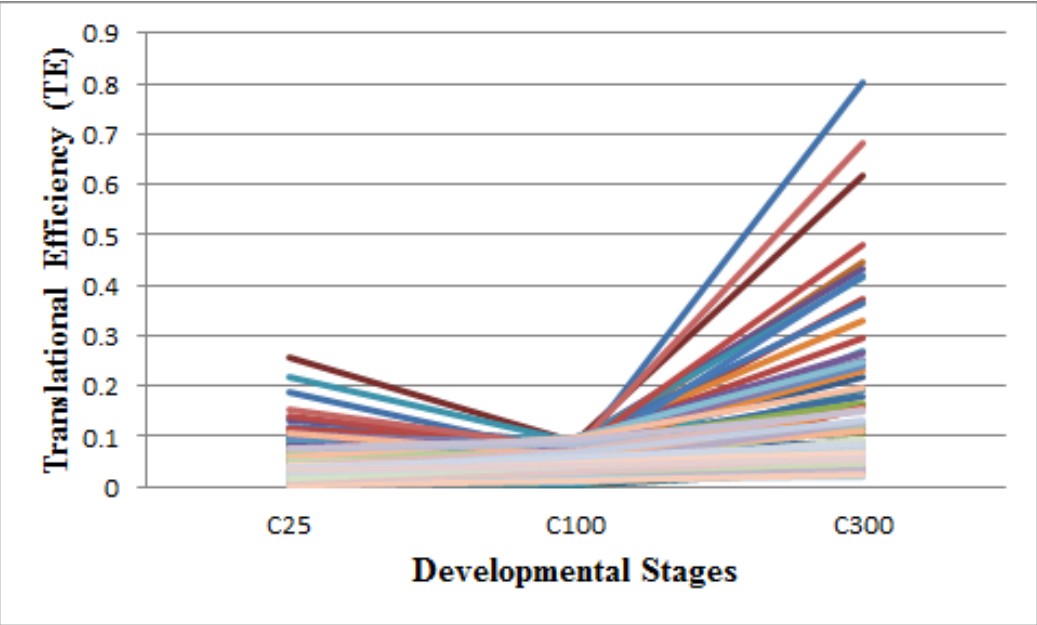



# Summary for C300

Filtering Criteria for Very Low TE Values:

( $P_{val} < 0.05$ ;  $TE \leq 0.1$  and  $CT_{RPKM} \geq 10$ )

Total Number of Genes: 244

Cluster1 : 76 genes

Cluster 2: 47 genes

Cluster 3: 121 genes

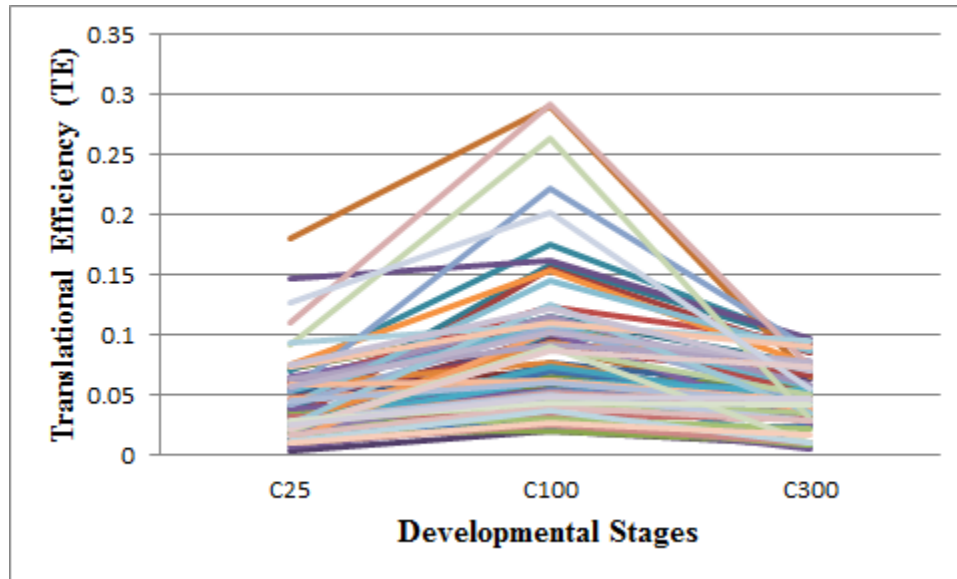

Cluster1 : 76 genes

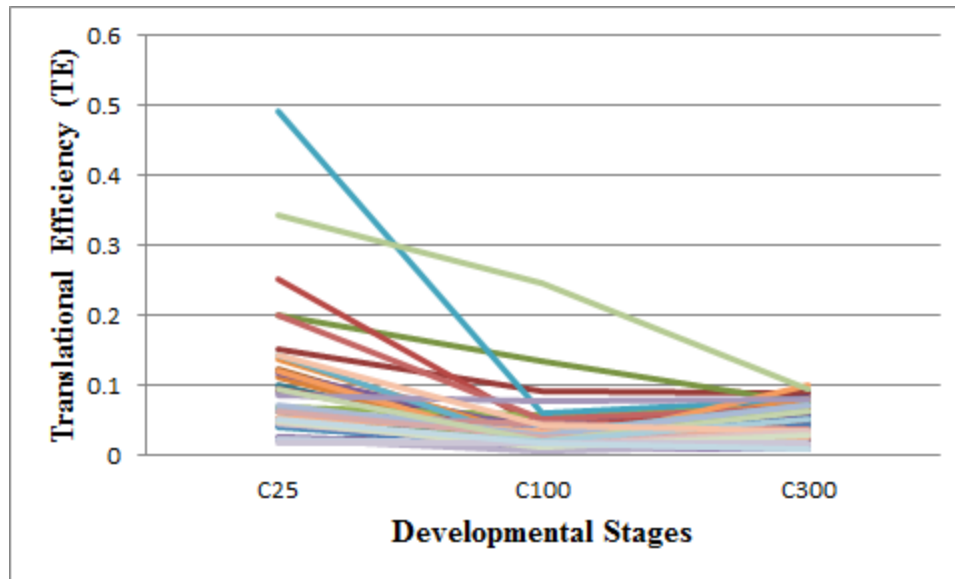

Cluster 2: 47 genes

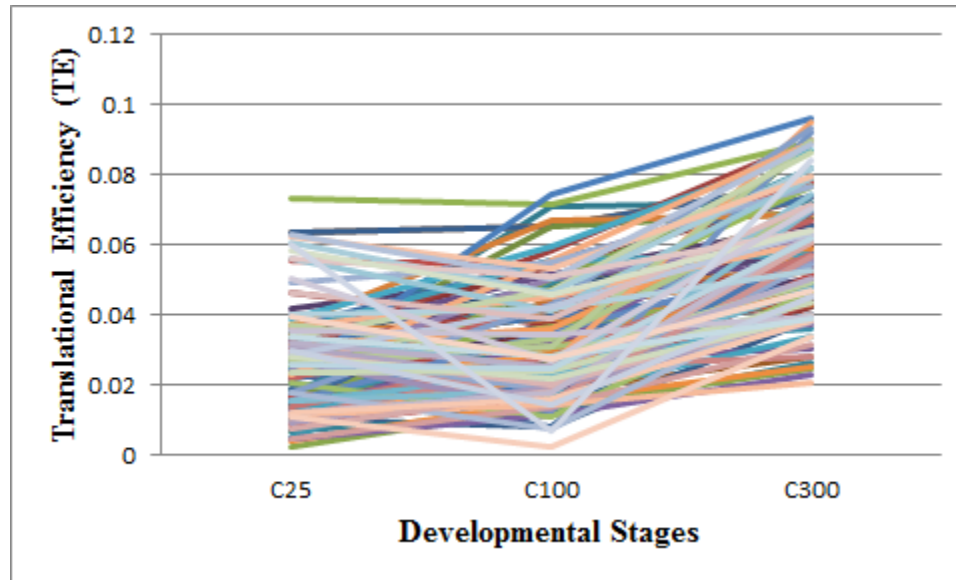

Cluster 3: 121 genes

C25\_Cluster 3: 114 genes

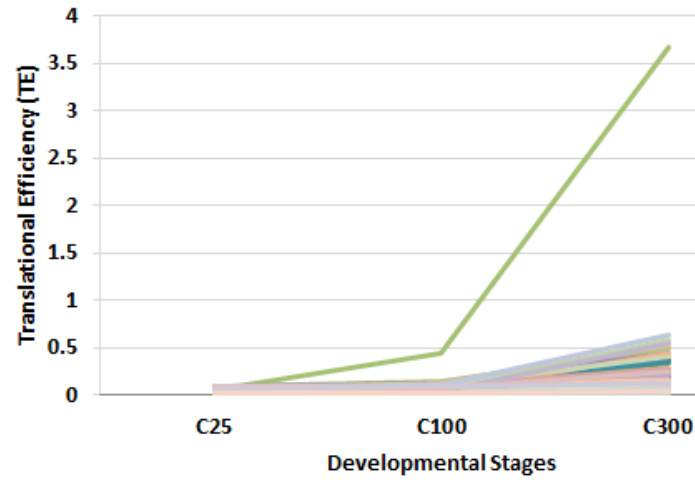

C100\_Cluster 3: 110 genes

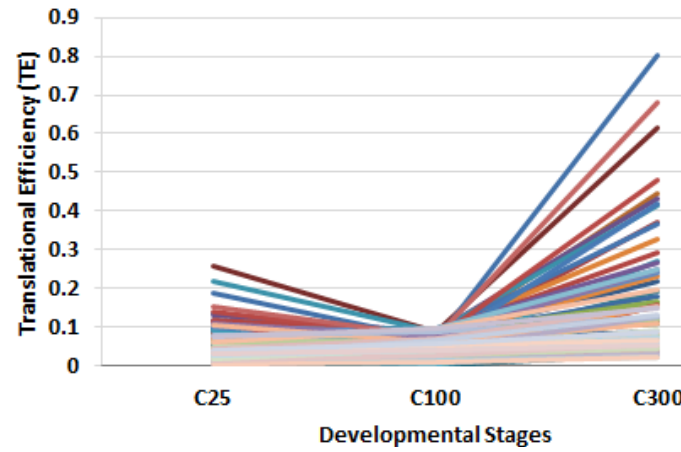

C300\_Cluster 3: 121 genes

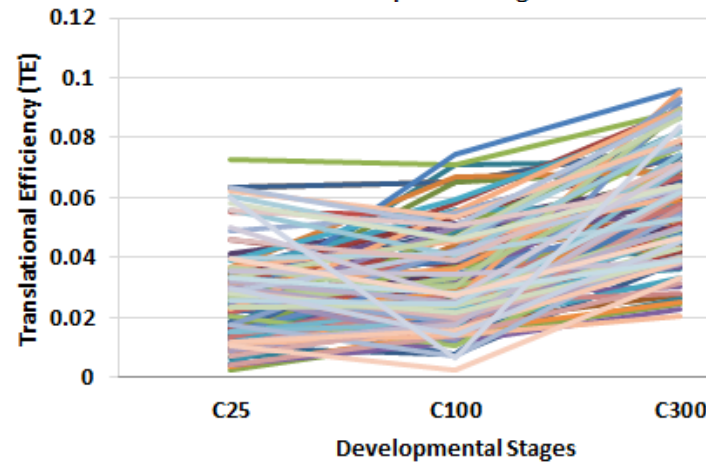

Supplement: pone.0194596.s010.pdf [file pone.0194596.s010.pdf]
